# Supplementary material
Source: Research Square preprint supplement (doi:10.21203/rs.3.rs-9243085/v1)
Supplement: Supplementary file 1 [file 0dd0632468d8e9be5e116717.docx]

**Supplementary File**

**Phytochemicals can counteract breast cancer by restoring autophagic flux and disrupting the LC3B–p62–Nrf2 feedback loop**

**Author & Coauthors:** Mehreen Aftab1,2*, Kamran Waidha3, Shagufta Khan1,Sandeep Sisodiya1, Avi Golan-Goldhirsh3, Jacob Gopas4, Showket Hussain1

1Division of Cellular and Molecular Diagnostics (Molecular Biology Group), ICMR- National Institute of Cancer Prevention and Research, Sector- 39, Noida. Uttar Pradesh, India.

2Department of Molecular Medicine, School of Interdisciplinary Science, Jamia Hamdard, New Delhi, India

3The Jacob Blaustein Institutes for Desert Research (BIDR), French Associates Institute for Agriculture and Biotechnology of Drylands, Sede Boqer Campus, Ben Gurion University of the Negev, 84990 Israel.

4The Shraga Segal Department of Microbiology, Immunology and Genetics Faculty of Health Sciences, Ben-Gurion University of the Negev, Beer Sheva 8410501, Israel.

***Corresponding authors**

**Showket Hussain**

[showket.hussain@gov.in](mailto:showket.hussain@gov.in)

**Mehreen Aftab**

mehreen@jamiahamdard.ac.in

**Table S1:** Quantitative PCR (qPCR) human primer nucleotide sequences

| **Gene symbol** | **Nucleotide sequence (5' to 3')** | |
| --- | --- | --- |
| LC3 (NM_022818) | Forward | GAGAAGCAGCTTCCTGTTCTGG |
| Reverse | GTGTCCGTTCACCAACAGGAAG |
| NRF2 (NM_006164) | Forward | CACATCCAGTCAGAAACCAGTGG |
| Reverse | GGAATGTCTGCGCCAAAAGCTG |
| p62 (NM_003900) | Forward | TGTGTAGCGTCTGCGAGGGAAA |
| Reverse | AGTGTCCGTGTTTCACCTTCCG |
| Beta-actin (NM_001101) | Forward | CACCATTGGCAATGAGCGGTTC |
|  | Reverse | AGGTCTTTGCGGATGTCCACGT |

**Table S2:** Primary and secondary antibody details

| **Target protein** | **Company** | **Application** |
| --- | --- | --- |
| LC3 | Cell Signaling #3868 | Immunoblot |
| Immunofluorescence |
| NRF2 | Sigma #L7543 | Immunoblot |
| Immunofluorescence |
| p62 | Santacruz, #sc-28359 | Immunoblot |
| Immunofluorescence |
| Beta-actin | mAbcam 8226 | Immunoblot |
| Anti-mouse IgG-HRP | Cell Signaling #7074 | Immunoblot |
| Anti-rabbit IgG-HRP | Cell Signaling #7076 | Immunoblot |
| Anti-rabbit Alexa Fluor™ 488 Antibody | Invitrogen, # A11008 | Immunofluorescence |
| Anti-mouse Alexa Fluor™ 564 Antibody | Invitrogen, # A-11030 | Immunofluorescence |


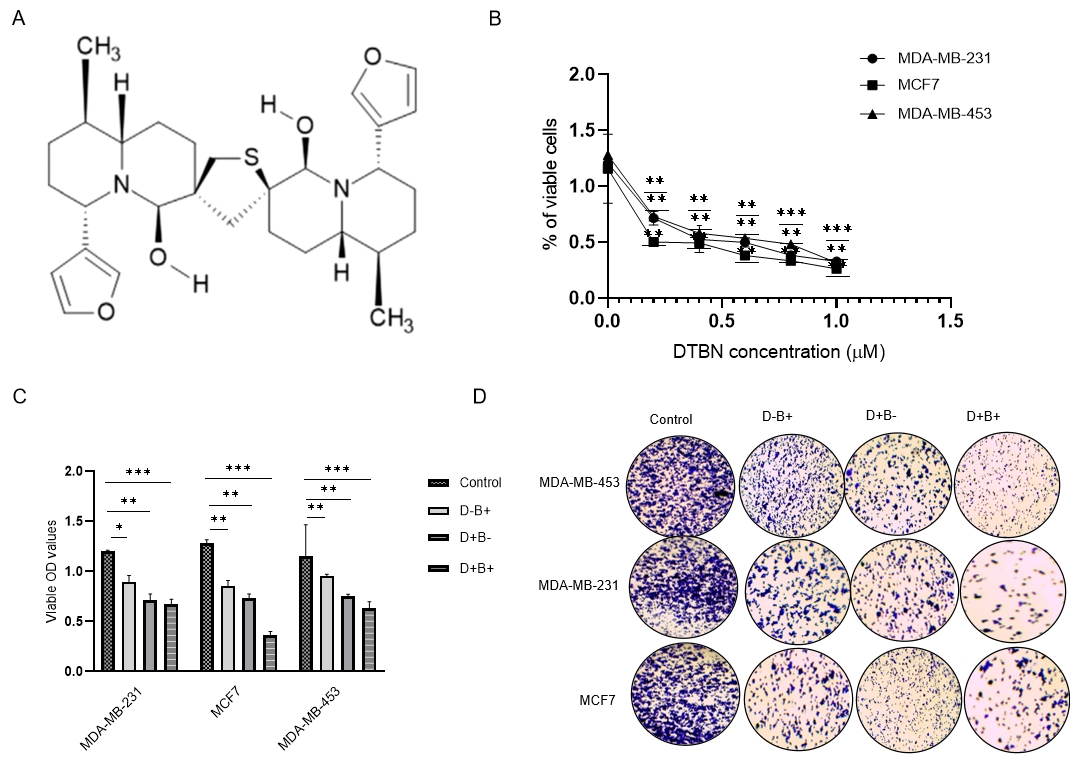


Figure S1;(A) Structure of DTBN: Purified extract from Nuphar lutea, 6,6′-dihydroxythiobinupharidine . DTBN decreases breast cancer cells (different Tp53 status) viability dose dependently. (B) MTT-based viability assay of breast cancer cells with various DTBN concentrations after 24 hours of treatment. IC50 value calculated using non-linear regression. (C-D) Cell viability of cells after the treatment of brusatol (0.2&0.5µM) and DTBN (0.2 & 0.5µM) for 24 hours.


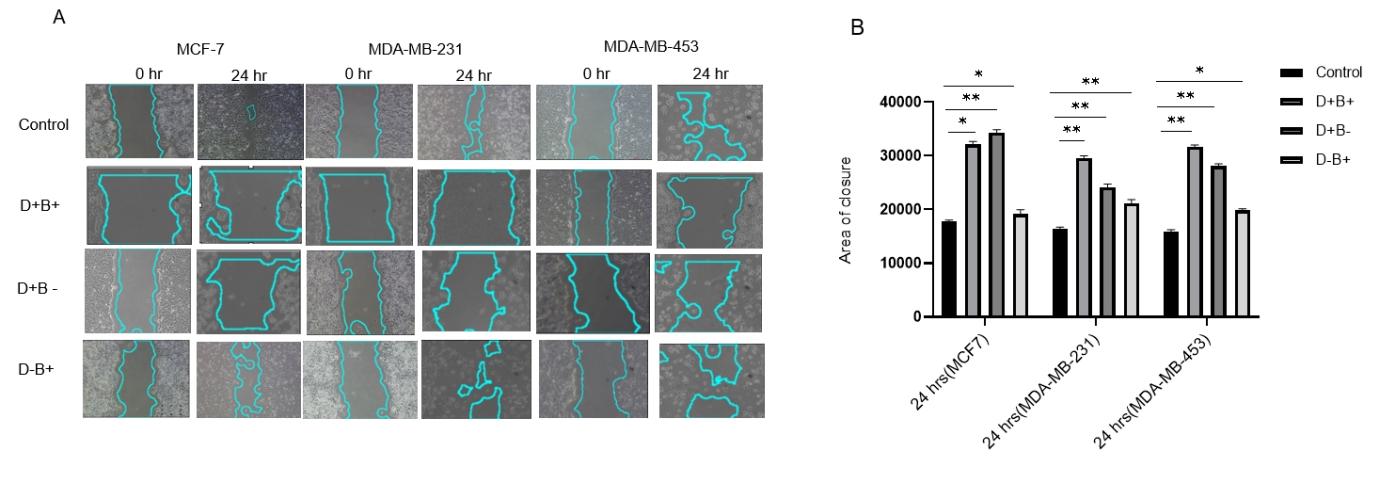


Figure S2: Scratch wound healing assay to determine the effect of DTBN and Brusatol on the migration of breast cancer cells (MCF7, MDA-MB-231 &MDA-MB-453)


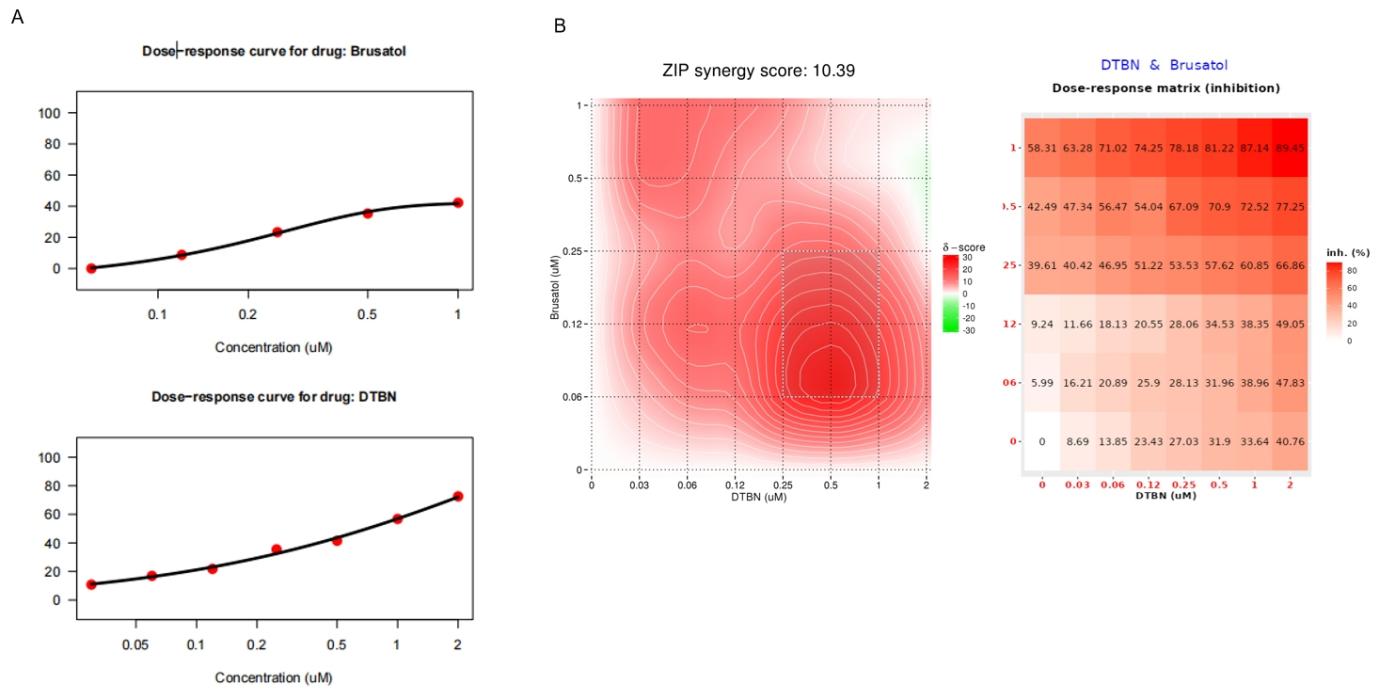


Figure S3: DTBN and Brusatol synergism was predicted by synergy combination index/scores

(A)


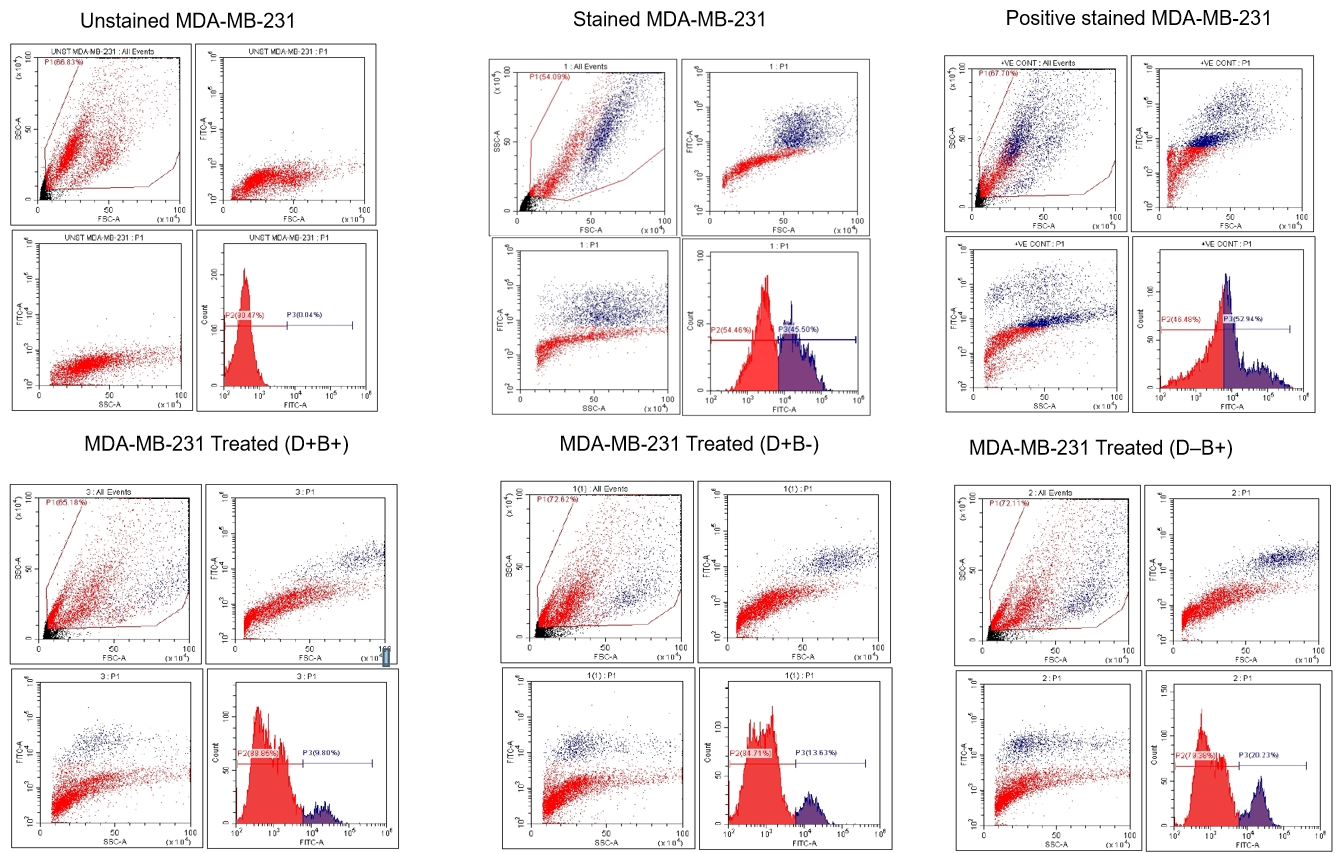


(B)
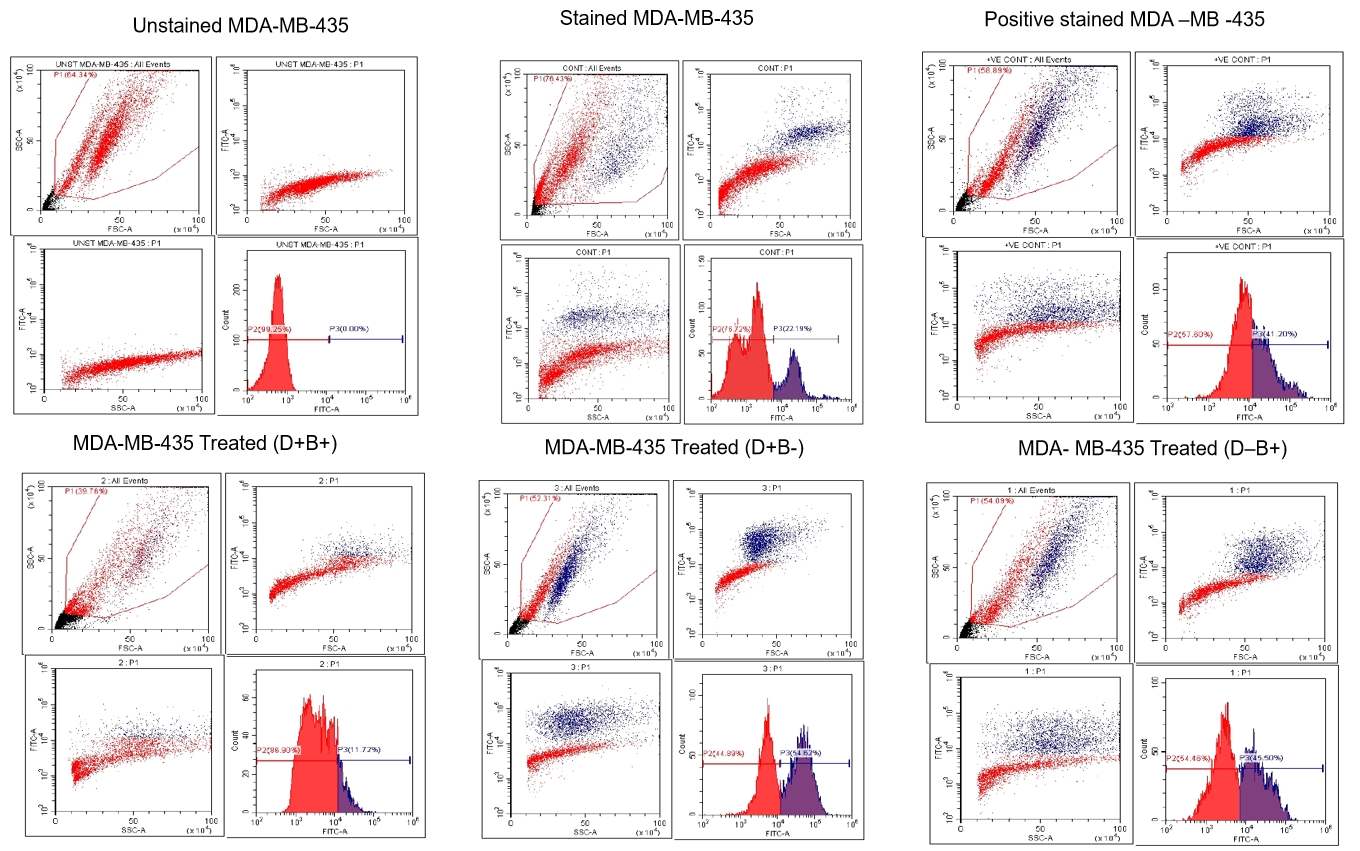


(C )
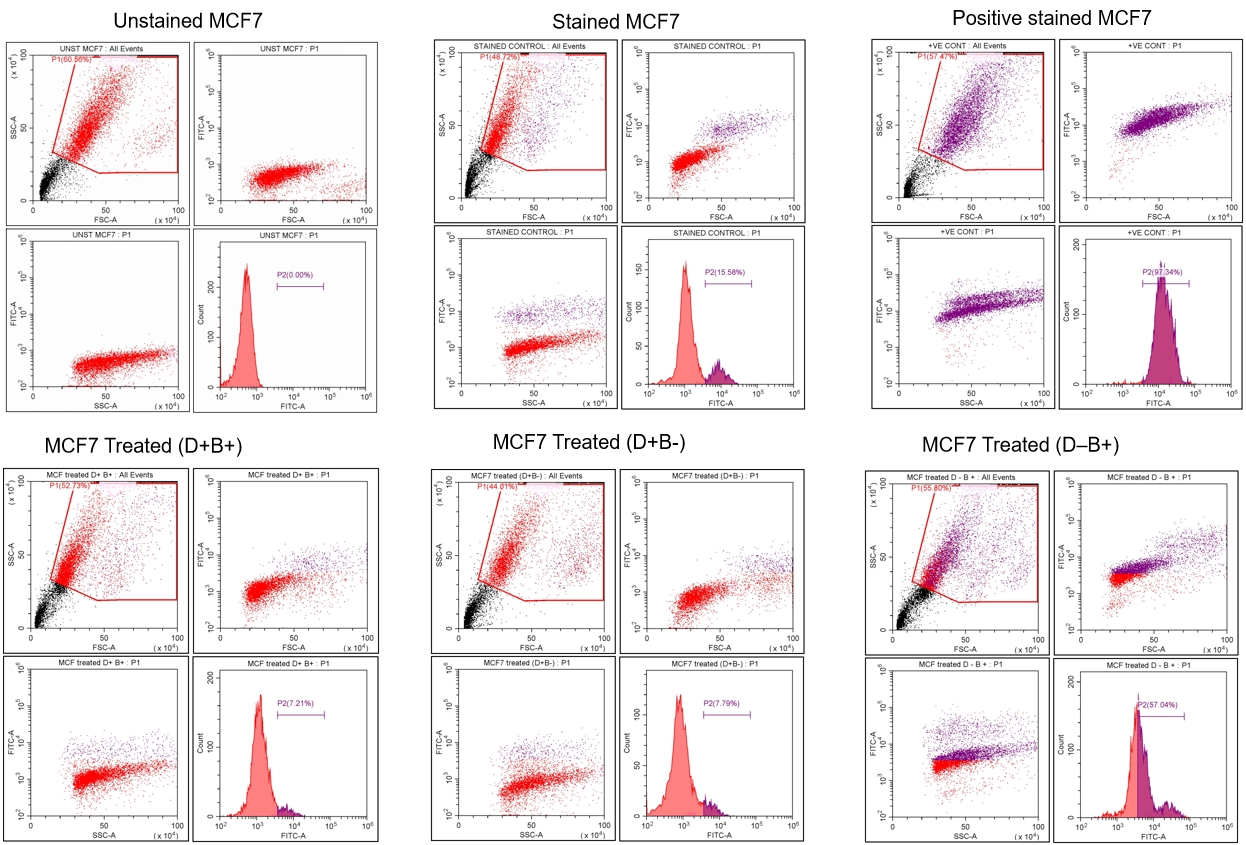


Figure S4; Representative FACS images showing reactive oxygen species levels in control samples, DTBN-treated samples, and samples treated with both DTBN and brusatol.(A) MCF7,(B)MDA-MB-231& (C)MDA-MB-453.


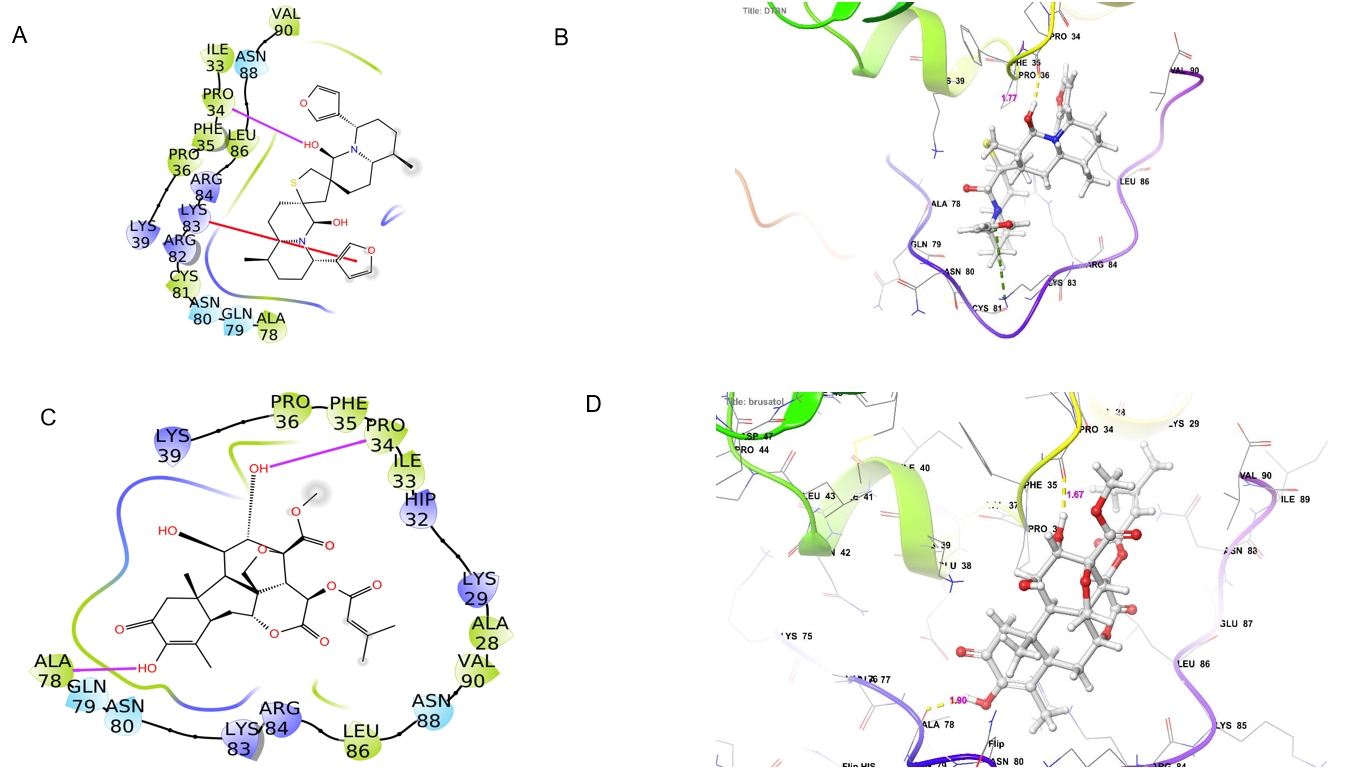


Figure S5; Molecular docking analysis and score of NRF2 against (A) DTBN and (B) Brusatol (NRF2 inhibitor)


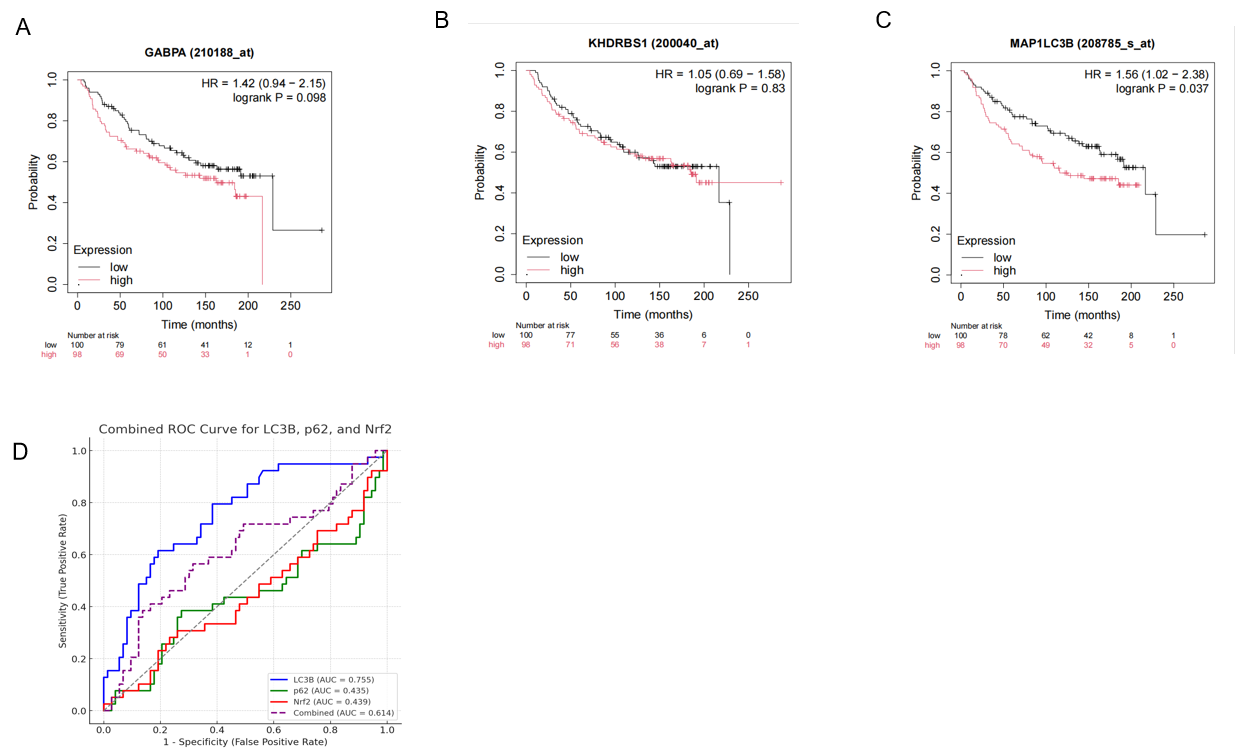


Figure S6: Publicly available data analysis to find out the prognosis and diagnosis of Nrf2, p62 & LC3 (A-C) Survival plot by kaplan Meier plotter (D) Combined Reciever operating curve (ROC)


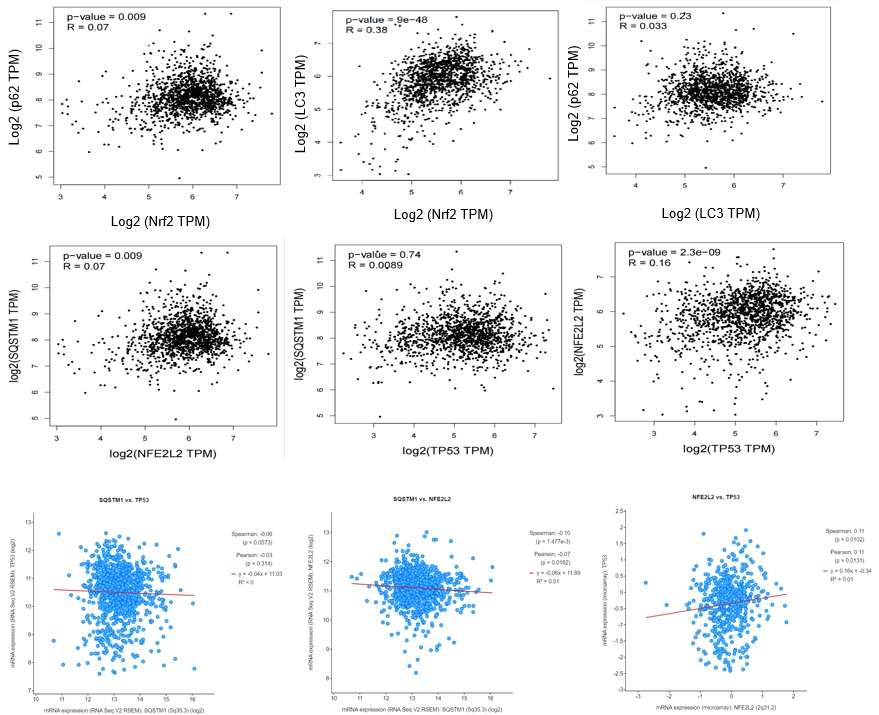


Figure S7; Plots of Pearson's correlation between (A)p62 and Nrf2 (B) LC3 and Nrf2 (C) p62&LC3


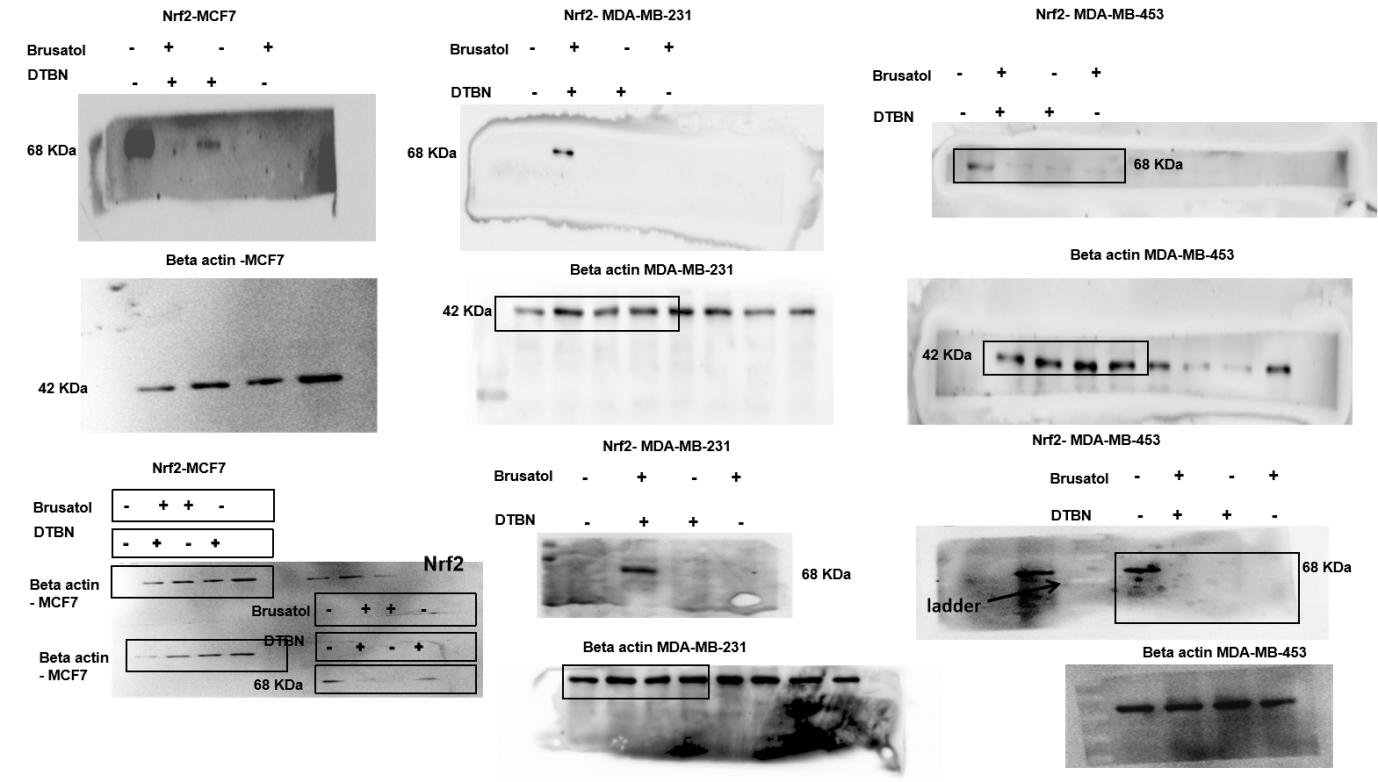


**Original images of fig. 3B.**


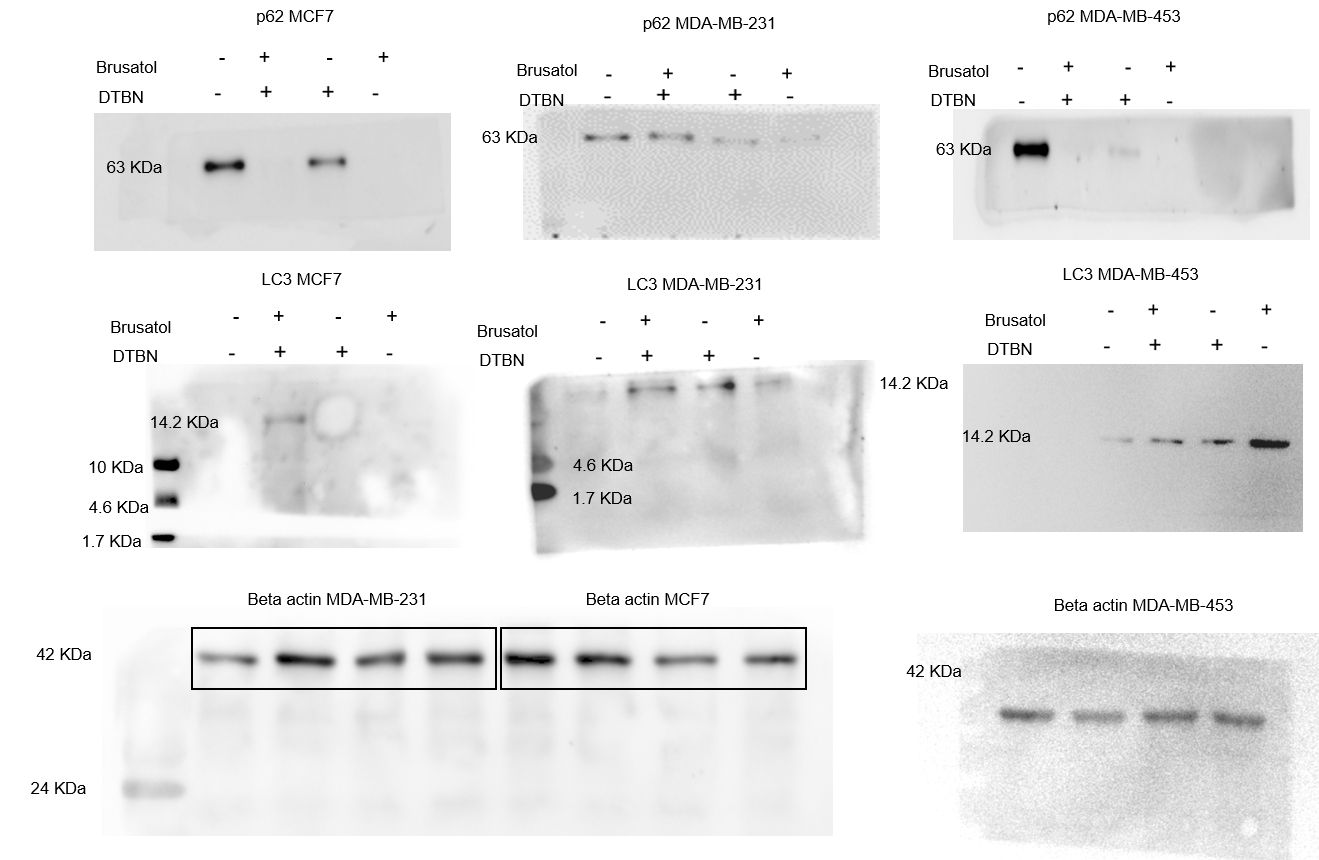


**Original images of fig. 4B.**


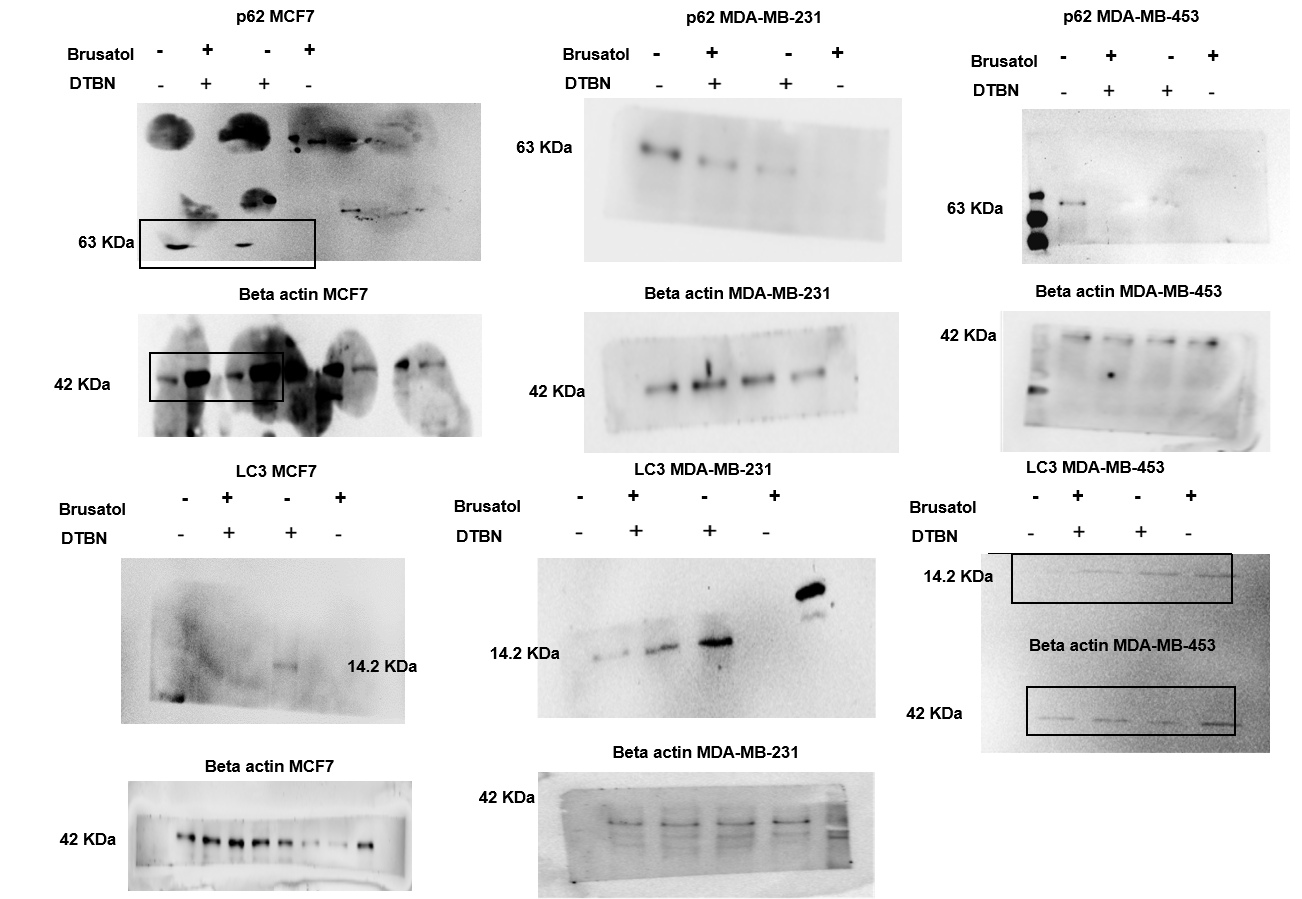


**Original images of fig. 4B.**
